# Supplementary material for: Multivariate Time Series Clustering of Groundwater Quality Data to Develop Data-Driven Monitoring Strategies in a Historically Contaminated Urban Area
Source: MDPI journal article supplement (doi:10.3390/w15010148), 2022-12-30
Supplement: s1 [file s1]

**Journal:** Water

**Section:** New Sensors, New Technologies and Machine Learning in Water Sciences

**Special Issue:** Data-Driven Approach Supporting Groundwater Resource Understanding, Protection and Management

## **Multivariate time series clustering of groundwater quality data to develop data-driven monitoring strategies in a historically contaminated urban area**

**Chiara Zanotti <sup>1,\*</sup>, Marco Rotiroti<sup>1</sup>, Agnese Redaelli <sup>1</sup>, Mariachiara Caschetto<sup>1</sup>, Letizia Fumagalli<sup>1</sup>, Camilla Stano<sup>2</sup>, Davide Sartirana<sup>1</sup>, and Tullia Bonomi<sup>1</sup>**

<sup>1</sup> University of Milano – Bicocca, Department of Earth and Environmental Sciences

<sup>2</sup> A2A Ciclo Idrico S.p.A;

\*Correspondence: chiara.zanotti@unimib.it

### **Content:**

Number of pages: 2

Number of figures: 1

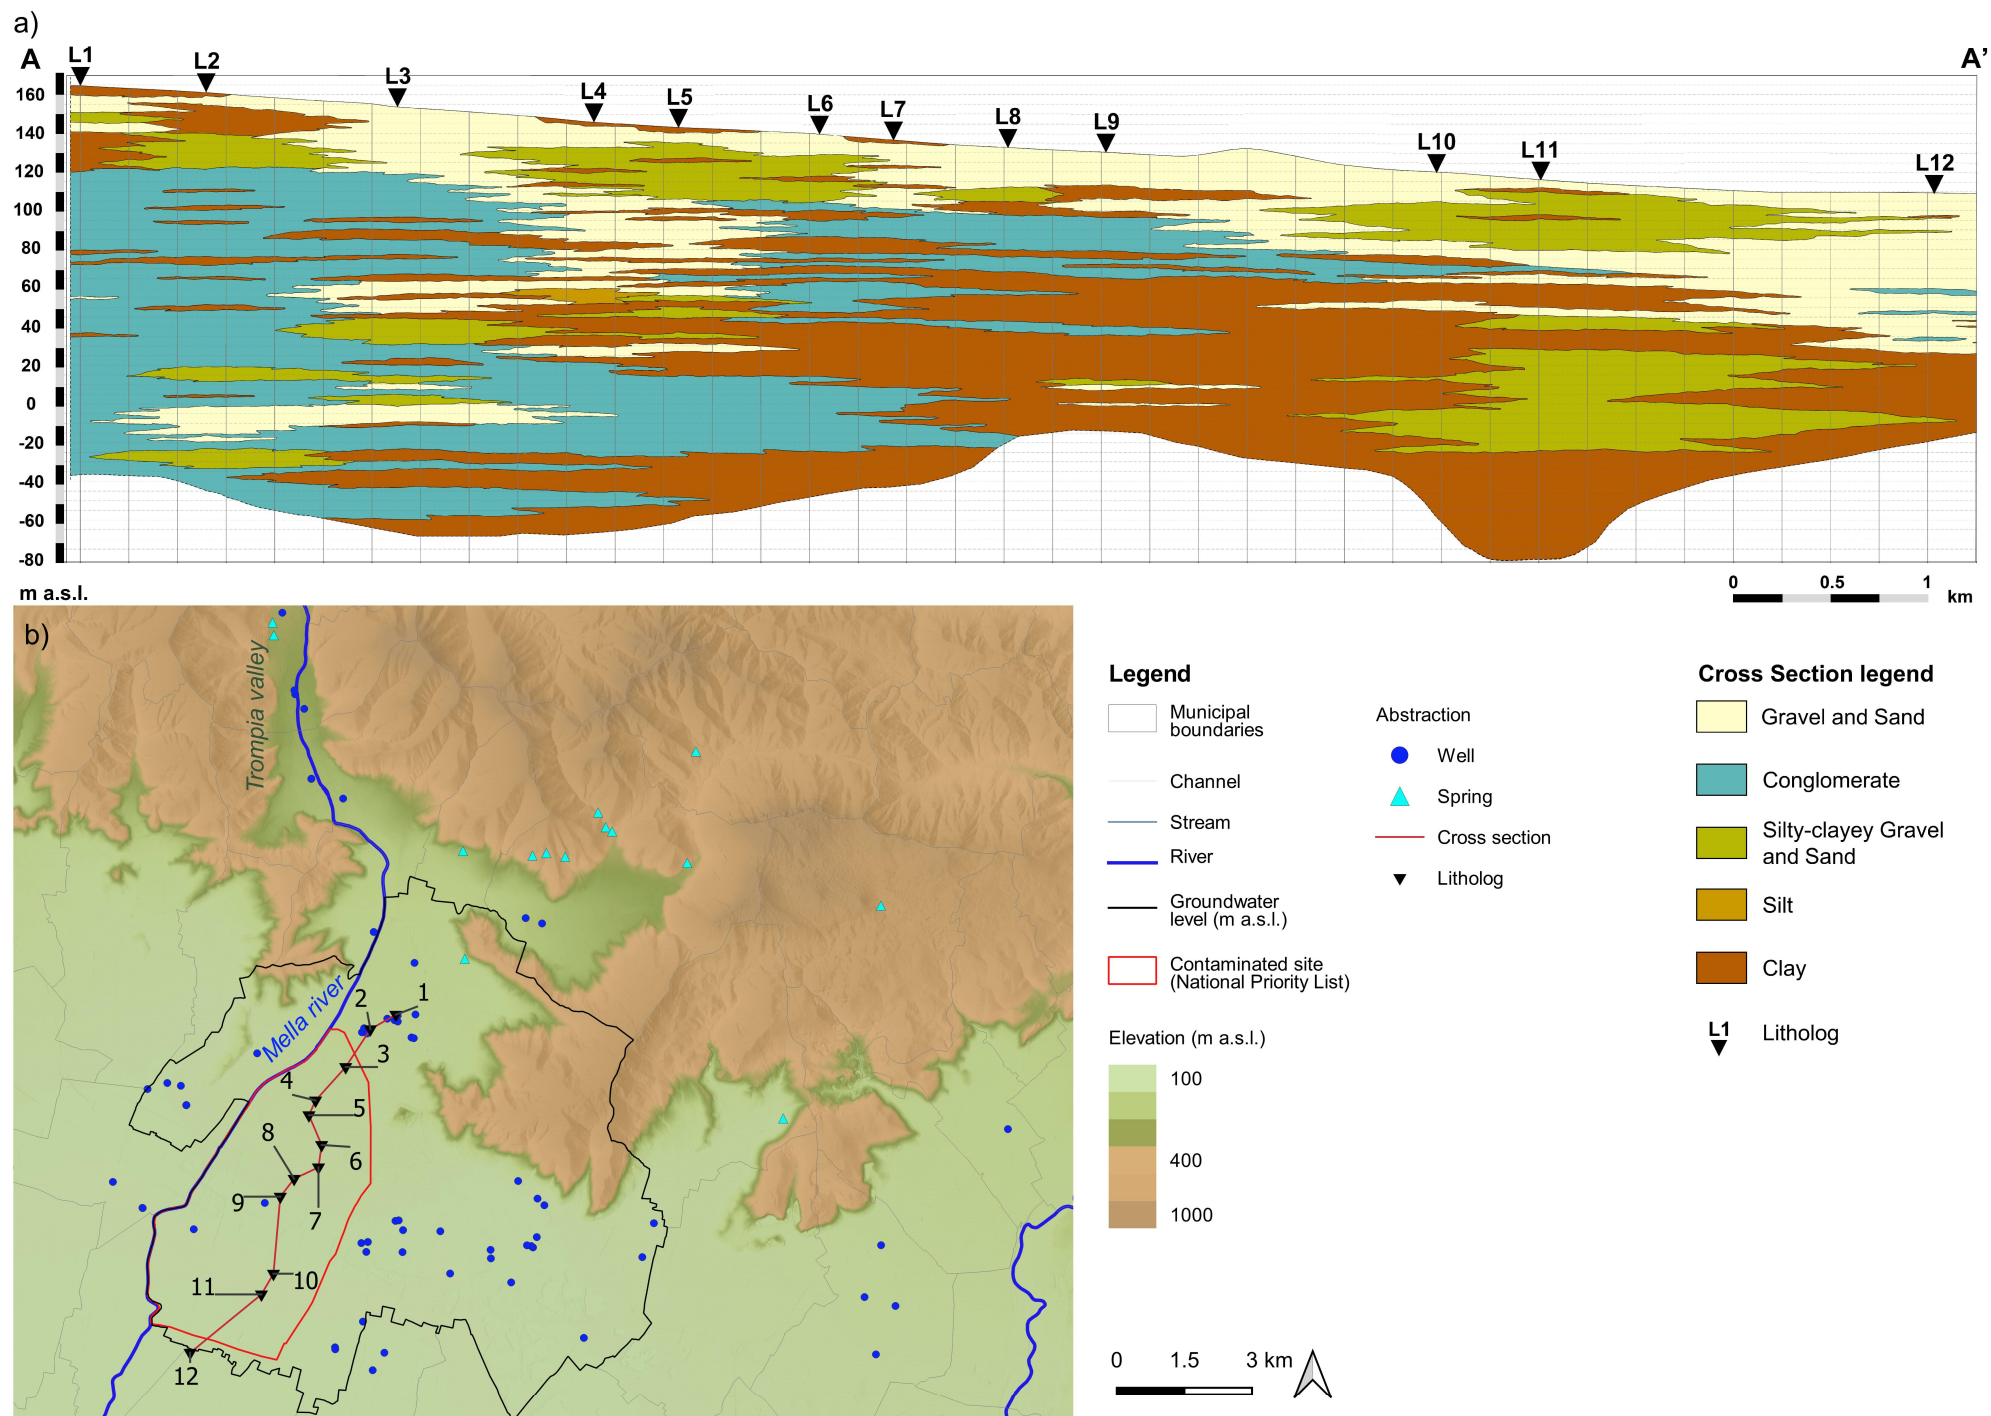

Figure S1 – a) cross section, modified from: Carloni, A. Studio Di Fattibilità per La Realizzazione Degli Interventi Di Messa in Sicurezza e Bonifica Delle Acque Di Falda Del “SIN Brescia Caffaro”.; 2013;  
b) study area, cross section and lithologs
